# Supplementary material
Source: HighWire-hosted journal article supplement (http://www.cmaj.ca/highwire/filestream/74415/field_highwire_adjunct_files/2/190573-com-3-at.pdf)
Supplement: 190573-com-3-at.pdf [file 190573-com-3-at.pdf]

## **Appendix 3 (as submitted by the authors): Additional Projects**

### **1. Alberta 2019 Report on the Prevalence and Quality of Care in Chronic Kidney Disease**

The report provides information on prevalence and the findings on established quality indicators for early stages (Stage 1-4) of chronic kidney disease across the province. It identifies opportunities to improve unwarranted practice variation and outcomes, enhance targeted screening, and increase the proportion of patients appropriately prescribed guideline-recommended treatment. To read the report please visit <https://www.albertahealthservices.ca/assets/about/scn/ahs-scn-kh-ckd-report-2019.pdf>

### **2. Provincial Indicators for High Value Nephrology Care in Alberta**

All nephrologists in Alberta are invested in providing high quality care to Albertans – though formal indicators do not exist. The AMA's Section of Nephrology in collaboration with the Kidney Health Strategic Clinical Network™ and the nephrology programs in Alberta are creating indicators that reflect high value care. The first quality indicators report is anticipated to be released in the spring of 2019. For more information please contact Dr. Braden Manns [Braden.Manns@albertahealthservices.ca](mailto:Braden.Manns@albertahealthservices.ca).

### **3) Reduce Acute Kidney Injury**

Prevention, early identification, and optimal management of acute kidney injury (AKI) will prevent or ameliorate progression to CKD. The KHSCN is supporting projects that utilize clinical decision support tools and strategies in hospitalized patients and cardiac catheterization laboratories to reduce the risk and improve management and follow up of AKI. <https://cumming.ucalgary.ca/alberta-aki/support-aki-0>

### **4) Conservative Kidney Management Pathway**

Aggressive treatment including dialysis may not be a desirable or beneficial option for all patients with ESKD. A KHSCN supported research project developed, implemented and evaluated a pathway for end stage patients that focused on living well without dialysis (<https://www.ckmcare.com/>)

## 5) Kidney Check

This CIHR funded Can-Solve project will evaluate kidney, diabetes and blood pressure screening management and follow up to Indigenous communities in Alberta through mobile and local health-care teams. See <http://www.cansolvekd.ca/research/theme-1/kidney-check>
